# Supplementary material
Source: HighWire-hosted journal article supplement (https://diabetes.diabetesjournals.org/content/suppl/2009/01/13/db08-1464)

**A**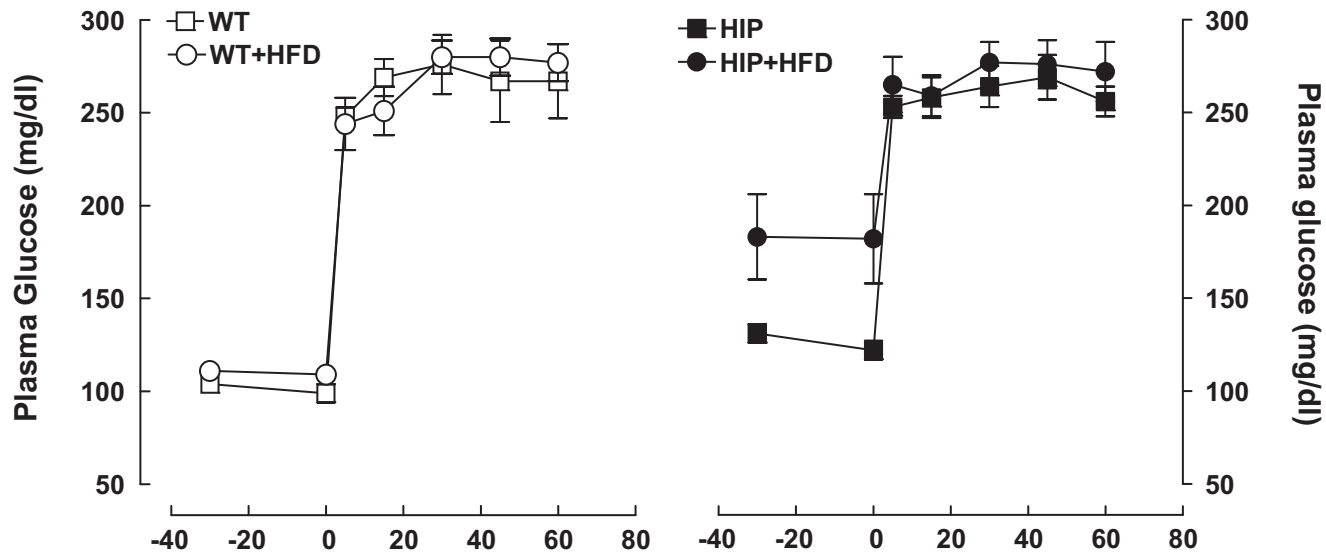**B**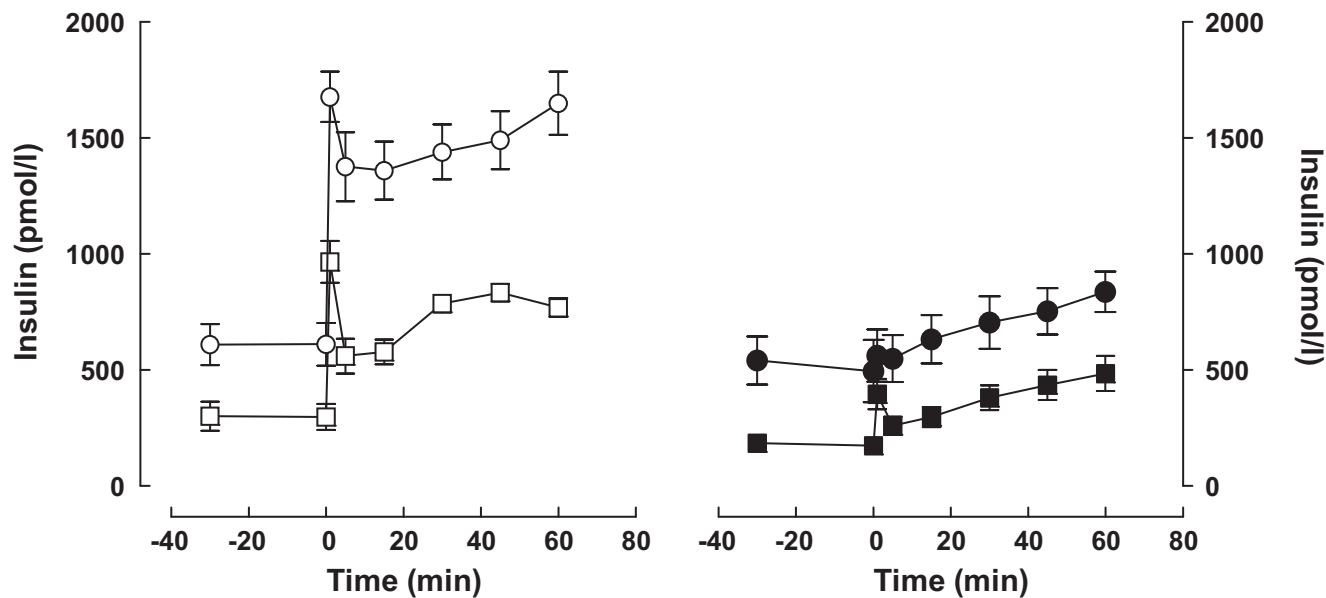

Supplement: db08-14641.suppl.pdf [file db08-14641.suppl.pdf]
